# Supplementary material for: Enhanced two-step two-frequency upconversion luminescence in a core/shell/shell nanostructure
Source: Royal Society of Chemistry journal article supplement (doi:10.1039/d2ma01040b), 2022-12-16
Supplement: d2ma01040b1.pdf [file d2ma01040b1.pdf]

## Supplementary Information for

# Enhanced two-step two-frequency upconversion luminescence in core/shell/shell nanostructure

Dongcheng Han,<sup>a,b,c</sup> Shizhi Yang,<sup>a,c,\*</sup> Qiang Zhao,<sup>d,\*</sup> Liangliang Zhang,<sup>e</sup> Yan Deng,<sup>d</sup>

<sup>a</sup>Key Laboratory of Atmospheric Optics, Anhui Institute of Optics and Fine Mechanics, HFIPS, Chinese Academy of Sciences, Hefei 230031, China

<sup>b</sup>Science Island Branch of Graduate School, University of Science and Technology of China, Hefei, Anhui 230026, China

<sup>c</sup>Advanced Laser Technology Laboratory of Anhui Province, Hefei 230037, China

<sup>d</sup>School of Environment and Energy Engineering, Anhui Jianzhu University, Hefei 230601, China

<sup>e</sup>Anhui Easpeed Technology Co. Ltd, Hefei, Anhui 230088, China

\*Corresponding Authors

Shizhi Yang: szyang@aiofm.ac.cn

Qiang Zhao: rommel99@163.com

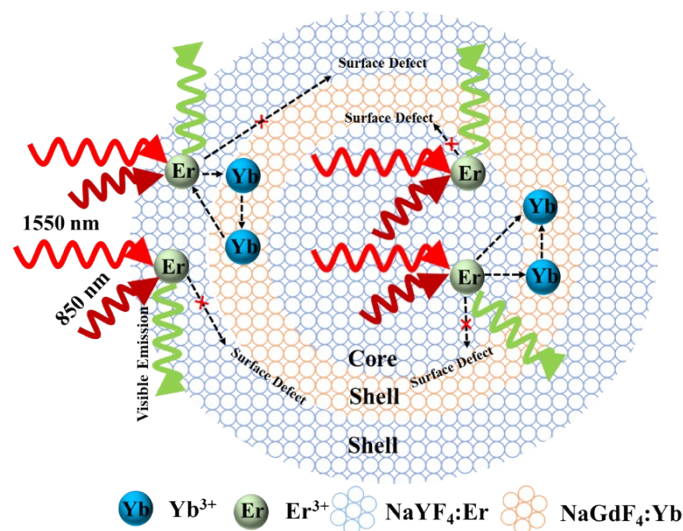

**Figure S1.** The designed core/shell/shell nanostructure to enhance the TSTF UCL.

A novel strategy of designed core/shell/shell nanostructure was first proposed to enhance the TSTF UCL intensity and contrast, as shown in Figure S1. Commonly, RE-doped UCNPs often suffer from low UC efficiency mainly caused by surface defects<sup>1-3</sup> and concentration quenching<sup>4,5</sup>. In order to get a stronger UCL, a core/shell/shell nanostructure was employed to reduce surface defects of UCNPs. In addition, doping

$\text{Er}^{3+}$  ions separately in core and outer shell could not only decrease the concentration quenching of  $\text{Ln}^{3+}$  ions but also increase the absorption of 1550 nm.  $\text{Yb}^{3+}$  doped in inner shell could offer a new approach to improve 1550 nm absorption and UC emission.

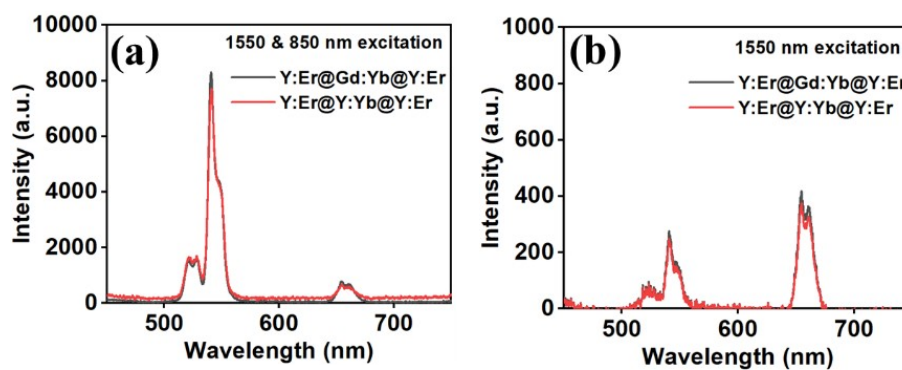

**Figure S2.** UC emission spectra of  $\text{NaYF}_4:\text{Er}@\text{NaGdF}_4:\text{Yb}@\text{NaYF}_4:\text{Er}$  ( $\text{Y}:\text{Er}@\text{Gd}:\text{Yb}@\text{Y}:\text{Er}$ ) and  $\text{NaYF}_4:\text{Er}@\text{NaYF}_4:\text{Yb}@\text{NaYF}_4:\text{Er}$  ( $\text{Y}:\text{Er}@\text{Y}:\text{Yb}@\text{Y}:\text{Er}$ ) UCNPs under (a) 850 & 1550 nm, (b) 1550 nm excitation.

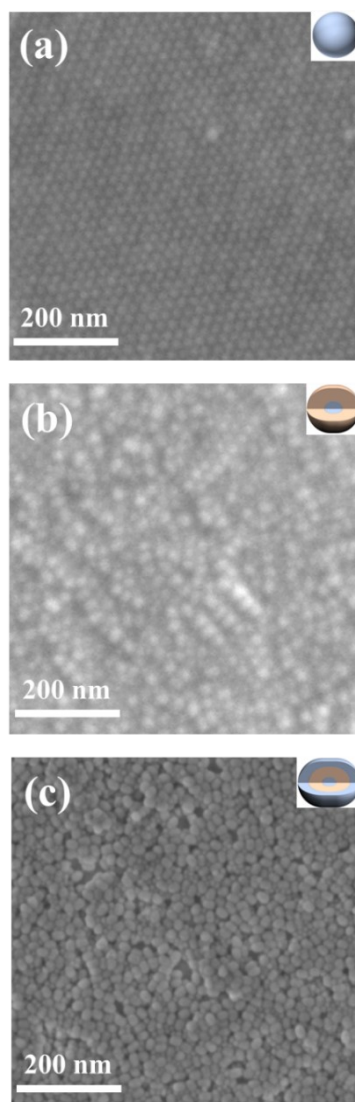

**Figure S3.** SEM images of (a)  $\text{NaYF}_4:0.5\%\text{Er}$ , (b)  $\text{NaYF}_4:0.5\%\text{Er}@\text{NaGdF}_4:2\%\text{Yb}$  and (c)  $\text{NaYF}_4:0.5\%\text{Er}@\text{NaGdF}_4:2\%\text{Yb}@\text{NaYF}_4:1\%\text{Er}$  UCNPs.



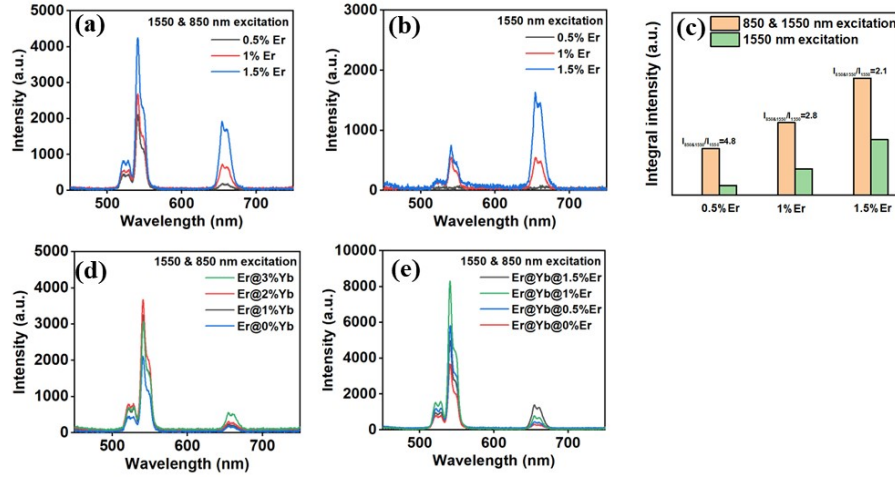

**Figure S5.** UC emission spectra of  $\text{NaYF}_4:x\%\text{Er}$  ( $x = 0.5, 1, 1.5$ ) UCNPs under (a) 850 & 1550 nm, (b) 1550 nm excitation. (c) The UCL integral intensity and contrast of the above as-prepared UCNPs. (d) UC emission spectra of (d)  $\text{NaYF}_4:0.5\%\text{Er}@NaGdF_4:y\%\text{Yb}$  ( $y = 0, 1, 2, 3$ ) and (e)  $\text{NaYF}_4:0.5\%\text{Er}@NaGdF_4:2\%\text{Yb}@NaYF_4:z\%\text{Er}$  ( $z = 0, 0.5, 1, 1.5$ ) UCNPs under 850 & 1550 nm excitation.

In Figure S5, the UC emission spectra excited by 850 & 1550 nm or 1550 nm were measured for obtaining the UCL intensities and contrast of TSTF UCNPs. For  $\text{NaYF}_4:x\%\text{Er}$  ( $x = 0.5, 1, 1.5$ ) UCNPs (Figure S5a, b and c), when  $\text{Er}^{3+}$  ions doping concentrations raised from 0.5 to 1.5 mmol%, the TSTF UCL intensities gradually increased, however, the contrast decreased from 4.8 to 2.1. For a better application in 3-D display, the UCNPs with high contrast is more important than its UCL intensity. So,  $\text{NaYF}_4:0.5\%\text{Er}$  UCNPs were selected as core. Then, a series of  $\text{NaGdF}_4:y\%\text{Yb}$  ( $y = 0, 1, 2, 3$ ) layers were covered on core UCNPs, As Figure S5d shown, when 2 mmol%  $\text{Yb}^{3+}$  doped in the inner shell, the  $\text{NaYF}_4:0.5\%\text{Er}@NaGdF_4:2\%\text{Yb}$  UCNPs exhibited a highest UCL intensity and contrast. Finally, by optimizing  $\text{Er}^{3+}$  ions doping concentrations in outer shell, the  $\text{NaYF}_4:0.5\%\text{Er}@NaGdF_4:2\%\text{Yb}@NaYF_4:1\%\text{Er}$  UCNPs with highest UCL intensity and contrast were obtained (Figure S5e).

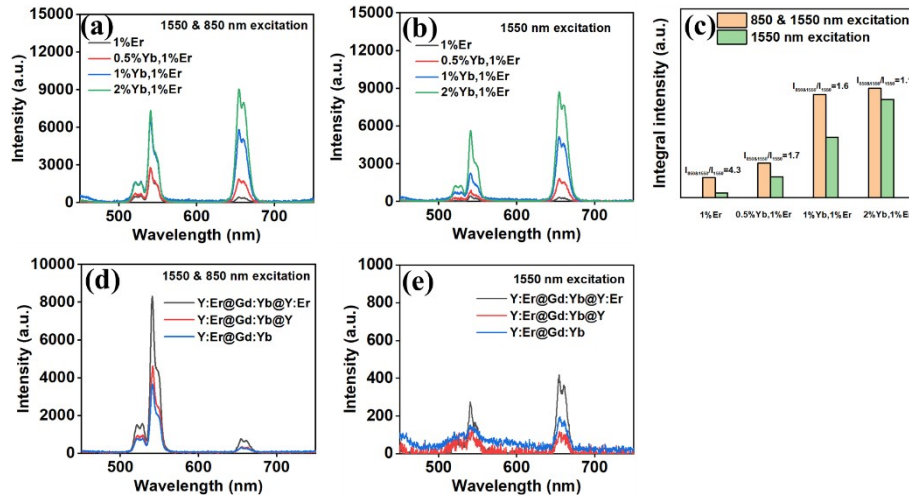

**Figure S6.** UC emission spectra of  $\text{NaYF}_4:x\%\text{Yb}, 1\%\text{Er}$  ( $x = 0, 0.5, 1, 2$ ) UCNPs under (a) 850 & 1550 nm, (b) 1550 nm excitation. (c) The UCL integral intensities and contrast of the above as-prepared UCNPs. UC emission spectra of  $\text{NaYF}_4:\text{Er}@NaGdF_4:\text{Yb}@NaYF_4:\text{Er}$  ( $\text{Y:Er}@Gd:\text{Yb}@$

Y:Er), NaYF<sub>4</sub>:Er@NaGdF<sub>4</sub>:Yb@NaYF<sub>4</sub> (Y:Er@Gd:Yb@Y) and NaYF<sub>4</sub>:Er@NaGdF<sub>4</sub>:Yb (Y:Er@Gd:Yb) UCNPs under (d) 850 & 1550 nm, (e) 1550 nm excitation.

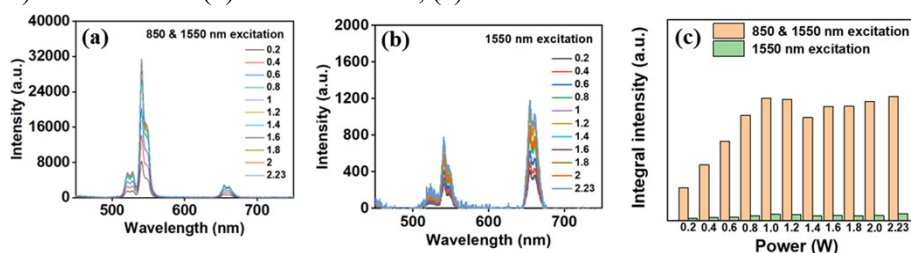

**Figure S7.** UC emission spectra of NaYF<sub>4</sub>:0.5%Er@NaGdF<sub>4</sub>:2%Yb@NaYF<sub>4</sub>:1%Er UCNPs excited by (a) 850 & 1550 nm, (b) 1550 nm under different pump powers of 1550 nm. (c) The UCL integral intensity of as-prepared UCNPs under different pump powers of 1550 nm. The 850 nm laser power is kept at 0.2 W.

Under 850 nm excitation, no single-frequency UCL was observed in as-prepared UCNPs. Fixing the 850 nm excitation power at 0.2 W, the 1550 nm laser excitation power is gradually increased from 0.2 W to 2.23 W. The excitation power of the laser at 1550 nm increased was measured, as shown in Figure S7a, b. It could be seen that the UCL integral intensities of NaYF<sub>4</sub>:0.5%Er@NaGdF<sub>4</sub>:2%Yb@NaYF<sub>4</sub>:1%Er UCNPs under 850 & 1550 nm excitation was enhanced with increasing pump power (0.2 ~ 1 W) (Figure S7c).

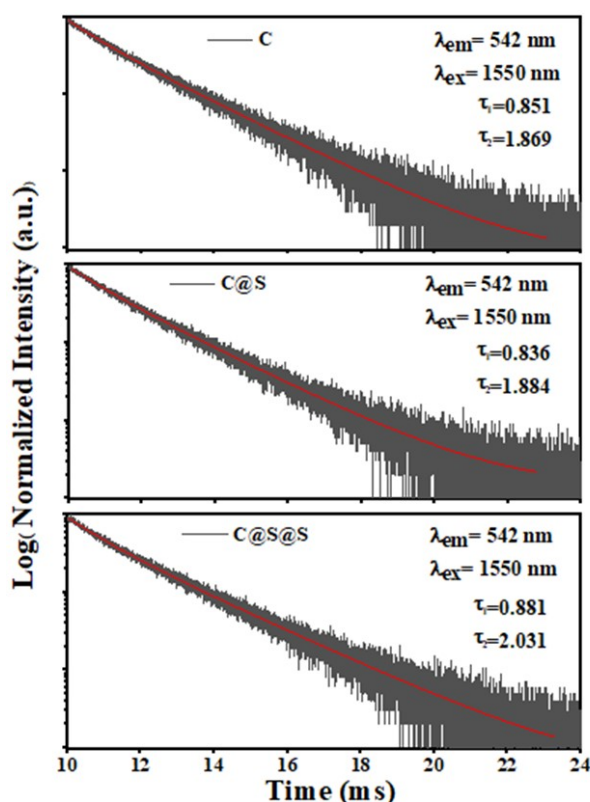

**Figure S8.** Time-decay curves of 542 nm UC emission for the NaYF<sub>4</sub>:0.5%Er (C), NaYF<sub>4</sub>:0.5%Er@NaGdF<sub>4</sub>:2%Yb (C@S) and NaYF<sub>4</sub>:0.5%Er@NaGdF<sub>4</sub>:2%Yb@NaYF<sub>4</sub>:1%Er (C@S@S) nanoparticles.

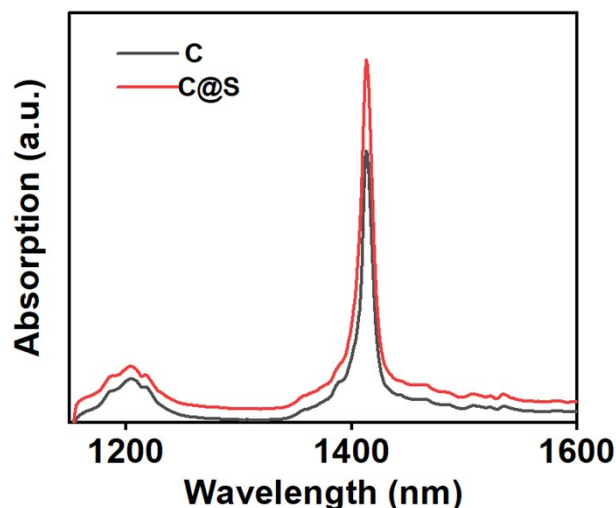

**Figure S9.** The absorption spectrum of C (black) and C@S (red) UCNPs around 1550 nm.

With the  $\text{Yb}^{3+}$ -doped  $\text{NaGdF}_4$  shell covered, the absorption intensity of C@S UCNPs increased, which means that the doped- $\text{Yb}^{3+}$  ions improved the absorption of 1550 nm excitation.

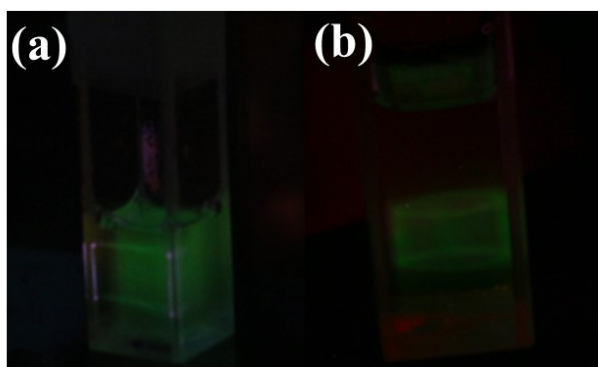

**Figure S10.** 3-D cube images of (a) Er@Er@Yb and (b) Er@Yb@Er UCNPs excited at 850 & 1550 nm.

Under the same experimental conditions, a clear green 3-D cube could be easily observed in Er@Yb@Er UCNPs (Figure S10b), while Er@Er@Yb UCNPs with low contrast is vague (Figure S10a), which shows that the high-contrast TSTF UCNP plays a significant role in improving the display effect of 3-D display.

## References

1. W. Bian, Y. Lin, T. Wang, X. Yu, J. Qiu, M. Zhou, H. Luo, S. Yu and X. Xu, *ACS Nano*, 2018, **12**, 3623-3628.
2. G. Tessitore, G. A. Mandl, M. G. Brik, W. Park and J. A. Capobianco, *Nanoscale*, 2019, **11**, 12015-12029.
3. D. Zhao, X. Li, R. Wang and F. Zhang, *Nano Lett.*, 2014, **14**, 3634-3639.
4. X. Zheng, S. Swati and Y. Zhang, *Nanoscale*, 2018, **10**, 16447-16454.
5. M. Feng, R. Lv, L. Xiao, B. Hu, S. Zhu, F. He, P. Yang and J. Tian, *Inorg. Chem.*, 2018, **57**, 14594-14602.
